# Supplementary material for: Elevated limb-bud and heart development (LBH) expression indicates poor prognosis and promotes gastric cancer cell proliferation and invasion via upregulating Integrin/FAK/Akt pathway
Source: PeerJ. 2019 May 6;7:e6885. doi: 10.7717/peerj.6885 (PMC6507893; doi:10.7717/peerj.6885)
Supplement: Table S4 — Expression values of LBH in GC and normal gastric tissues in the TCGA-STAD data set. The data is in FPKM format. “01” represents a gastric cancer sample, and ”11” represents a normal gastric tissue sample. [file peerj-07-6885-s004.xlsx]

## Sheet: LBH in TCGA STAD cohort
Keys	LBH	Type(11=normal；01=cancer)
TCGA-IN-8663-11	0.900049	11
TCGA-CG-5730-11	4.41332	11
TCGA-BR-7716-11	8.55411	11
TCGA-BR-7717-11	21.4339	11
TCGA-HU-A4GP-11	5.28174	11
TCGA-FP-7829-11	21.1389	11
TCGA-IN-AB1X-11	1.41772	11
TCGA-IN-AB1V-11	1.82872	11
TCGA-BR-7704-11	7.84427	11
TCGA-BR-7851-11	5.23951	11
TCGA-CG-5720-11	7.48331	11
TCGA-BR-8060-11	8.39708	11
TCGA-CG-5721-11	7.08818	11
TCGA-CG-5734-11	3.48099	11
TCGA-BR-6457-11	7.65197	11
TCGA-CG-5728-11	18.98	11
TCGA-CG-5722-11	9.09864	11
TCGA-HU-8238-11	2.73593	11
TCGA-HU-A4GN-11	5.17482	11
TCGA-BR-6454-11	11.2816	11
TCGA-HU-A4GH-11	13.7857	11
TCGA-BR-6802-11	4.33257	11
TCGA-HU-A4HB-11	6.82599	11
TCGA-CG-5733-11	11.0144	11
TCGA-IN-7806-11	1.01826	11
TCGA-IP-7968-11	5.38397	11
TCGA-BR-6453-11	4.81566	11
TCGA-HU-A4GC-11	6.45454	11
TCGA-BR-7715-11	21.5701	11
TCGA-BR-7703-11	6.82148	11
TCGA-FP-7735-11	3.55052	11
TCGA-HU-A4GY-11	6.57336	11
TCGA-HU-A4GX-01	6.01515	01
TCGA-VQ-A8P3-01	13.8603	01
TCGA-HJ-7597-01	8.29488	01
TCGA-BR-6455-01	8.13568	01
TCGA-D7-8576-01	15.7102	01
TCGA-HU-8604-01	11.5103	01
TCGA-CG-5719-01	22.5429	01
TCGA-HU-A4GD-01	2.57344	01
TCGA-BR-7715-01	16.5408	01
TCGA-HU-A4HD-01	6.80017	01
TCGA-BR-8486-01	23.441	01
TCGA-FP-7916-01	16.6836	01
TCGA-BR-4187-01	11.7354	01
TCGA-VQ-A925-01	17.2296	01
TCGA-CD-A48C-01	22.7645	01
TCGA-CG-4442-01	4.90176	01
TCGA-VQ-A8DU-01	17.5583	01
TCGA-D7-A6EV-01	8.98318	01
TCGA-IN-AB1V-01	5.65527	01
TCGA-VQ-AA64-01	28.1643	01
TCGA-HU-A4GP-01	7.50759	01
TCGA-VQ-A8DZ-01	11.9706	01
TCGA-VQ-A8PE-01	18.9433	01
TCGA-CD-8527-01	24.6024	01
TCGA-HU-A4H3-01	5.4328	01
TCGA-VQ-A8DT-01	4.19601	01
TCGA-HU-A4GF-01	7.87475	01
TCGA-HU-A4H0-01	5.91582	01
TCGA-MX-A663-01	21.0366	01
TCGA-VQ-A8P8-01	12.1763	01
TCGA-CD-8535-01	3.99103	01
TCGA-CD-8533-01	6.50946	01
TCGA-3M-AB47-01	13.5222	01
TCGA-BR-4294-01	4.49366	01
TCGA-BR-A4CS-01	8.74494	01
TCGA-IN-8462-01	14.0559	01
TCGA-CG-4462-01	20.372	01
TCGA-CD-8530-01	36.7399	01
TCGA-D7-6815-01	13.093	01
TCGA-FP-7998-01	17.2982	01
TCGA-CD-8526-01	24.0875	01
TCGA-VQ-AA68-01	9.63633	01
TCGA-CG-5718-01	10.0368	01
TCGA-F1-6874-01	9.91087	01
TCGA-VQ-A8E3-01	6.16309	01
TCGA-BR-8682-01	12.7196	01
TCGA-HU-A4H5-01	7.20871	01
TCGA-BR-A4J5-01	19.5289	01
TCGA-BR-8591-01	9.7431	01
TCGA-BR-7901-01	20.9408	01
TCGA-VQ-A94P-01	10.6719	01
TCGA-VQ-A8PU-01	5.20227	01
TCGA-CG-5716-01	7.55719	01
TCGA-FP-7829-01	8.60018	01
TCGA-BR-8590-01	18.7636	01
TCGA-VQ-A8PH-01	6.16258	01
TCGA-D7-A6F2-01	8.16051	01
TCGA-BR-7959-01	20.2666	01
TCGA-F1-6177-01	3.29168	01
TCGA-VQ-A91A-01	15.9649	01
TCGA-IN-A7NR-01	12.8345	01
TCGA-VQ-A91K-01	5.68736	01
TCGA-BR-4256-01	9.69925	01
TCGA-BR-4366-01	7.9825	01
TCGA-BR-6802-01	8.73479	01
TCGA-VQ-AA6J-01	11.667	01
TCGA-BR-6565-01	16.3428	01
TCGA-CD-5800-01	13.0331	01
TCGA-BR-8380-01	15.1385	01
TCGA-CG-5734-01	8.78771	01
TCGA-FP-8211-01	8.40636	01
TCGA-CG-4443-01	5.18179	01
TCGA-D7-8578-01	68.2486	01
TCGA-HF-7133-01	9.2425	01
TCGA-BR-7717-01	12.44	01
TCGA-BR-7716-01	28.7961	01
TCGA-B7-A5TJ-01	5.69787	01
TCGA-BR-4357-01	9.84047	01
TCGA-HU-A4GC-01	8.62918	01
TCGA-VQ-A924-01	3.88489	01
TCGA-MX-A5UG-01	23.6444	01
TCGA-BR-8077-01	12.2933	01
TCGA-CD-A4MG-01	7.30254	01
TCGA-D7-6520-01	32.0836	01
TCGA-BR-6707-01	14.601	01
TCGA-ZA-A8F6-01	9.94192	01
TCGA-FP-A4BF-01	14.7088	01
TCGA-R5-A7O7-01	15.4815	01
TCGA-RD-A7BT-01	3.90797	01
TCGA-CD-8531-01	5.68111	01
TCGA-BR-8384-01	11.3381	01
TCGA-RD-A7BS-01	14.3641	01
TCGA-D7-8572-01	22.8507	01
TCGA-VQ-A91E-01	4.40649	01
TCGA-VQ-A923-01	14.1874	01
TCGA-BR-8286-01	18.965	01
TCGA-CG-5722-01	16.9241	01
TCGA-CG-5723-01	6.48804	01
TCGA-BR-8483-01	7.07623	01
TCGA-BR-8365-01	16.5941	01
TCGA-HU-8608-01	17.1204	01
TCGA-CD-8528-01	4.63613	01
TCGA-HU-A4G2-01	9.74992	01
TCGA-BR-6458-01	37.4595	01
TCGA-VQ-AA6G-01	5.10577	01
TCGA-HU-8602-01	6.15363	01
TCGA-BR-4257-01	12.3475	01
TCGA-VQ-AA69-01	2.13197	01
TCGA-FP-A8CX-01	4.71274	01
TCGA-CG-4475-01	12.5315	01
TCGA-BR-8678-01	19.1515	01
TCGA-FP-8210-01	36.3938	01
TCGA-VQ-AA6F-01	9.42059	01
TCGA-BR-8373-01	15.8261	01
TCGA-CG-4476-01	9.11765	01
TCGA-D7-6527-01	9.44247	01
TCGA-VQ-A8PF-01	14.9265	01
TCGA-CD-8524-01	35.5237	01
TCGA-BR-4363-01	25.5939	01
TCGA-D7-5578-01	12.2323	01
TCGA-CD-A489-01	34.4733	01
TCGA-HU-A4GH-01	2.27014	01
TCGA-HF-7132-01	11.2535	01
TCGA-BR-8289-01	14.5385	01
TCGA-HU-A4H2-01	11.9037	01
TCGA-IN-8663-01	30.9223	01
TCGA-VQ-A91Y-01	26.04	01
TCGA-B7-A5TN-01	46.1616	01
TCGA-BR-6566-01	13.0974	01
TCGA-D7-6524-01	20.2947	01
TCGA-HF-7131-01	9.7561	01
TCGA-BR-4191-01	16.5805	01
TCGA-IN-A6RR-01	7.51636	01
TCGA-CD-8525-01	11.1053	01
TCGA-BR-7958-01	19.4809	01
TCGA-IN-AB1X-01	5.86916	01
TCGA-BR-8284-01	23.1055	01
TCGA-VQ-A91N-01	6.51633	01
TCGA-BR-8683-01	24.3554	01
TCGA-RD-A7C1-01	5.9594	01
TCGA-HU-A4G3-01	5.22847	01
TCGA-CG-5726-01	2.13024	01
TCGA-HU-A4H4-01	10.0785	01
TCGA-BR-8381-01	22.3018	01
TCGA-FP-8631-01	20.7328	01
TCGA-D7-6822-01	4.57458	01
TCGA-VQ-A91U-01	11.5371	01
TCGA-BR-8686-01	14.0746	01
TCGA-BR-4280-01	4.36273	01
TCGA-VQ-A94T-01	5.79003	01
TCGA-CG-4305-01	10.2236	01
TCGA-BR-4253-01	10.1472	01
TCGA-RD-A8N9-01	24.1219	01
TCGA-HU-A4GQ-01	5.05352	01
TCGA-D7-5577-01	9.84374	01
TCGA-D7-6521-01	17.2583	01
TCGA-IN-7806-01	4.11558	01
TCGA-RD-A8N4-01	6.05369	01
TCGA-BR-A4PF-01	6.11979	01
TCGA-B7-A5TI-01	11.0056	01
TCGA-VQ-A8P5-01	14.1136	01
TCGA-CG-5724-01	34.7433	01
TCGA-MX-A5UJ-01	8.21277	01
TCGA-IN-A6RI-01	2.8278	01
TCGA-VQ-A91D-01	5.09483	01
TCGA-B7-5818-01	8.56169	01
TCGA-BR-7707-01	6.59607	01
TCGA-BR-8059-01	20.5846	01
TCGA-KB-A93J-01	14.2932	01
TCGA-CG-5717-01	6.26422	01
TCGA-BR-A4J6-01	18.5685	01
TCGA-RD-A8NB-01	9.232	01
TCGA-D7-8579-01	13.2997	01
TCGA-HU-A4GJ-01	35.67	01
TCGA-FP-8099-01	13.7933	01
TCGA-VQ-A91V-01	2.72615	01
TCGA-BR-6801-01	9.62875	01
TCGA-BR-8366-01	17.6727	01
TCGA-IN-A6RL-01	8.60572	01
TCGA-BR-8367-01	10.7132	01
TCGA-D7-8573-01	4.23724	01
TCGA-HU-A4G9-01	1.13134	01
TCGA-CG-4466-01	3.69079	01
TCGA-BR-8485-01	29.1385	01
TCGA-CG-5725-01	18.7747	01
TCGA-IN-A6RO-01	2.58128	01
TCGA-CG-5732-01	10.7147	01
TCGA-BR-8361-01	9.05401	01
TCGA-HU-A4H8-01	2.10771	01
TCGA-BR-8687-01	15.6835	01
TCGA-BR-A4J8-01	11.8157	01
TCGA-D7-6526-01	5.71521	01
TCGA-VQ-A8PK-01	19.5065	01
TCGA-BR-8680-01	7.12326	01
TCGA-VQ-A927-01	6.81891	01
TCGA-IN-A7NU-01	9.71347	01
TCGA-BR-7704-01	16.5916	01
TCGA-BR-6454-01	19.4711	01
TCGA-BR-8372-01	5.94839	01
TCGA-D7-A747-01	21.9216	01
TCGA-EQ-8122-01	12.1529	01
TCGA-CG-5721-01	11.258	01
TCGA-HF-A5NB-01	3.78748	01
TCGA-VQ-A91X-01	1.59076	01
TCGA-D7-A4YX-01	6.53947	01
TCGA-BR-8081-01	14.6253	01
TCGA-BR-8368-01	5.14304	01
TCGA-CD-5799-01	9.12732	01
TCGA-CG-4440-01	6.59185	01
TCGA-BR-8677-01	17.7431	01
TCGA-BR-7851-01	9.79994	01
TCGA-VQ-A8PB-01	7.51968	01
TCGA-CD-A486-01	12.8444	01
TCGA-VQ-AA6A-01	16.9741	01
TCGA-BR-4367-01	12.9382	01
TCGA-BR-8589-01	8.73162	01
TCGA-HU-A4GU-01	2.89774	01
TCGA-CG-4465-01	7.28897	01
TCGA-D7-A748-01	11.6636	01
TCGA-CG-4460-01	11.4454	01
TCGA-CG-4441-01	16.8842	01
TCGA-R5-A7ZE-01	7.13292	01
TCGA-MX-A666-01	14.4483	01
TCGA-IN-A6RS-01	8.99447	01
TCGA-BR-7723-01	11.5668	01
TCGA-ZQ-A9CR-01	18.0173	01
TCGA-D7-A4Z0-01	10.8797	01
TCGA-CD-5804-01	16.2982	01
TCGA-BR-A4J9-01	8.96446	01
TCGA-HU-8238-01	6.53997	01
TCGA-RD-A8MV-01	10.0657	01
TCGA-BR-8371-01	11.6198	01
TCGA-BR-8676-01	4.83876	01
TCGA-VQ-A8PD-01	18.7021	01
TCGA-VQ-A8PP-01	10.4604	01
TCGA-BR-4368-01	9.9982	01
TCGA-VQ-A8E2-01	29.921	01
TCGA-BR-8296-01	14.5735	01
TCGA-IN-A6RJ-01	2.29785	01
TCGA-IN-A6RN-01	10.2304	01
TCGA-CD-5801-01	11.7669	01
TCGA-BR-4371-01	4.03492	01
TCGA-CG-4477-01	9.05451	01
TCGA-BR-8295-01	97.4957	01
TCGA-BR-4370-01	17.822	01
TCGA-D7-8574-01	38.4702	01
TCGA-VQ-A928-01	15.5842	01
TCGA-IN-7808-01	25.4136	01
TCGA-BR-6709-01	51.9194	01
TCGA-IN-A7NT-01	4.94995	01
TCGA-CG-5720-01	7.63967	01
TCGA-VQ-A8DV-01	8.16312	01
TCGA-D7-A4YU-01	12.5735	01
TCGA-KB-A93H-01	3.11492	01
TCGA-B7-A5TK-01	16.196	01
TCGA-BR-8592-01	18.0411	01
TCGA-BR-4361-01	11.6916	01
TCGA-CG-4444-01	13.6084	01
TCGA-D7-6525-01	24.4506	01
TCGA-CG-4469-01	7.03522	01
TCGA-BR-8690-01	26.3783	01
TCGA-CD-5798-01	23.4341	01
TCGA-BR-7957-01	12.8061	01
TCGA-VQ-A91Z-01	5.53101	01
TCGA-HU-8249-01	7.05085	01
TCGA-HF-7134-01	8.4455	01
TCGA-KB-A6F7-01	8.45346	01
TCGA-BR-4201-01	13.9929	01
TCGA-VQ-A8P2-01	4.36363	01
TCGA-D7-A6F0-01	9.9488	01
TCGA-BR-6852-01	12.0104	01
TCGA-BR-7197-01	12.0135	01
TCGA-VQ-A94R-01	10.241	01
TCGA-VQ-A91Q-01	17.3751	01
TCGA-CG-4438-01	14.2414	01
TCGA-D7-8575-01	22.1535	01
TCGA-BR-A4IV-01	24.012	01
TCGA-BR-7722-01	19.4848	01
TCGA-BR-6803-01	21.3562	01
TCGA-CD-A48A-01	9.20193	01
TCGA-BR-6564-01	25.8072	01
TCGA-BR-6457-01	19.8842	01
TCGA-VQ-A8PM-01	13.8093	01
TCGA-BR-7196-01	17.2848	01
TCGA-VQ-A922-01	31.9408	01
TCGA-VQ-A8E0-01	5.65176	01
TCGA-BR-8291-01	19.1142	01
TCGA-RD-A7BW-01	22.5494	01
TCGA-VQ-A8PO-01	10.3558	01
TCGA-HU-8610-01	21.7948	01
TCGA-BR-A4CR-01	7.7949	01
TCGA-VQ-A94O-01	17.4984	01
TCGA-VQ-A8E7-01	33.0261	01
TCGA-CG-4306-01	7.91866	01
TCGA-BR-8369-01	14.8952	01
TCGA-D7-6528-01	5.29074	01
TCGA-VQ-AA6D-01	4.18302	01
TCGA-RD-A8N6-01	20.1839	01
TCGA-D7-6522-01	31.6098	01
TCGA-BR-8588-01	10.2133	01
TCGA-BR-8382-01	16.5463	01
TCGA-BR-8484-01	13.9324	01
TCGA-BR-A44T-01	26.5057	01
TCGA-BR-6453-01	33.0509	01
TCGA-3M-AB46-01	13.5135	01
TCGA-VQ-A8PC-01	10.4049	01
TCGA-BR-4279-01	13.4382	01
TCGA-SW-A7EB-01	17.3536	01
TCGA-BR-4369-01	20.1038	01
TCGA-D7-6519-01	47.9153	01
TCGA-R5-A7ZI-01	9.30081	01
TCGA-VQ-AA6K-01	22.7297	01
TCGA-BR-8058-01	21.6898	01
TCGA-BR-6456-01	29.367	01
TCGA-CG-4304-01	10.4084	01
TCGA-HU-8244-01	0.894212	01
TCGA-VQ-A92D-01	8.85284	01
TCGA-CD-8534-01	7.55052	01
TCGA-VQ-A91S-01	22.0628	01
TCGA-FP-8209-01	21.36	01
TCGA-D7-A6EX-01	32.7873	01
TCGA-BR-6705-01	48.2591	01
TCGA-CD-8532-01	25.8353	01
TCGA-RD-A8N2-01	8.91132	01
TCGA-BR-4267-01	7.39191	01
TCGA-CD-5803-01	36.525	01
TCGA-D7-A6EY-01	18.6622	01
TCGA-BR-A4J4-01	6.75331	01
TCGA-HU-A4GY-01	20.6443	01
TCGA-BR-A4QL-01	2.40414	01
TCGA-BR-8679-01	10.4442	01
TCGA-D7-6818-01	11.7977	01
TCGA-R5-A805-01	8.3952	01
TCGA-BR-8487-01	4.4803	01
TCGA-CD-A4MH-01	16.2856	01
TCGA-BR-8060-01	14.3835	01
TCGA-BR-8297-01	16.2955	01
TCGA-HU-A4H6-01	9.38094	01
TCGA-R5-A7ZF-01	16.1782	01
TCGA-CD-A487-01	15.9852	01
TCGA-F1-A72C-01	13.1988	01
TCGA-FP-7735-01	9.90094	01
TCGA-IP-7968-01	31.3987	01
TCGA-BR-6710-01	3.97927	01
TCGA-R5-A7ZR-01	4.02514	01
TCGA-FP-A9TM-01	9.99407	01
TCGA-SW-A7EA-01	14.0181	01
TCGA-HU-A4HB-01	17.7165	01
TCGA-BR-A4J7-01	21.5502	01
TCGA-D7-8570-01	13.5432	01
TCGA-KB-A93G-01	21.9139	01
TCGA-CD-8529-01	23.4446	01
TCGA-BR-8364-01	30.4981	01
TCGA-VQ-A8PX-01	7.56934	01
TCGA-D7-A74A-01	7.10513	01
TCGA-RD-A8N0-01	20.9924	01
TCGA-HU-A4GT-01	3.77146	01
TCGA-VQ-A8PJ-01	7.77688	01
TCGA-D7-A6EZ-01	9.51844	01
TCGA-VQ-A8PQ-01	41.549	01
TCGA-RD-A8N1-01	13.9704	01
TCGA-BR-A44U-01	8.23092	01
TCGA-BR-8080-01	28.6776	01
TCGA-F1-A448-01	14.6997	01
TCGA-HU-A4G8-01	9.79021	01
TCGA-BR-6452-01	12.3746	01
TCGA-CD-5813-01	16.8248	01
TCGA-RD-A8N5-01	23.2652	01
TCGA-CG-4301-01	24.6783	01
TCGA-CG-4437-01	10.1002	01
TCGA-BR-6563-01	29.9248	01
TCGA-F1-6875-01	7.44549	01
TCGA-RD-A8MW-01	16.8126	01
TCGA-CG-4436-01	2.93117	01
TCGA-VQ-A94U-01	11.3633	01
