# Supplementary material for: Elevated limb-bud and heart development (LBH) expression indicates poor prognosis and promotes gastric cancer cell proliferation and invasion via upregulating Integrin/FAK/Akt pathway
Source: PeerJ. 2019 May 6;7:e6885. doi: 10.7717/peerj.6885 (PMC6507893; doi:10.7717/peerj.6885)
Supplement: Table S5 — Expression values of LBH in GC and adjacent tissues in GSE29272 dataset. ”1” represents a tissue sample of gastric cancer, and ”0” represents a sample of adjacent tissues. [file peerj-07-6885-s005.xlsx]

## Sheet: GSE29272 LBH expression
iD_REF	LBH	type(1=cancer;0=adjacent normal)
GSM723464	8.82156	0
GSM723465	10.0567	1
GSM723466	8.77559	0
GSM723467	10.2676	1
GSM723468	8.20231	0
GSM723469	9.90899	1
GSM723470	8.05864	0
GSM723471	10.1365	1
GSM723472	8.55533	0
GSM723473	9.65263	1
GSM723474	8.52485	0
GSM723475	9.29696	1
GSM723476	7.88347	0
GSM723477	9.97829	1
GSM723478	8.59472	0
GSM723479	10.4241	1
GSM723480	8.99787	0
GSM723481	9.27463	1
GSM723482	8.12714	0
GSM723483	9.28408	1
GSM723484	8.2439	0
GSM723485	8.18106	1
GSM723486	8.80328	0
GSM723487	9.05488	1
GSM723488	9.29829	0
GSM723489	9.17845	1
GSM723490	9.03499	0
GSM723491	10.1065	1
GSM723492	8.41395	0
GSM723493	9.13297	1
GSM723494	8.70493	0
GSM723495	10.1163	1
GSM723496	8.14109	0
GSM723497	9.24479	1
GSM723498	8.2518	0
GSM723499	8.99286	1
GSM723500	8.62987	0
GSM723501	10.0249	1
GSM723502	8.31591	0
GSM723503	9.73254	1
GSM723504	8.26752	0
GSM723505	9.80893	1
GSM723506	8.31012	0
GSM723507	8.98236	1
GSM723508	8.59007	0
GSM723509	9.9499	1
GSM723510	8.70607	0
GSM723511	9.84361	1
GSM723512	9.12602	0
GSM723513	9.70335	1
GSM723514	8.22436	0
GSM723515	10.0242	1
GSM723516	8.4112	0
GSM723517	8.72415	1
GSM723518	8.36967	0
GSM723519	9.82871	1
GSM723520	8.82145	0
GSM723521	9.06201	1
GSM723522	8.28968	0
GSM723523	9.79606	1
GSM723524	9.10305	0
GSM723525	9.26829	1
GSM723526	8.61651	0
GSM723527	9.01537	1
GSM723528	9.06008	0
GSM723529	8.35277	1
GSM723530	8.53721	0
GSM723531	9.13745	1
GSM723532	8.73482	0
GSM723533	10.1195	1
GSM723534	8.81716	0
GSM723535	8.33815	1
GSM723536	8.07029	0
GSM723537	10.497	1
GSM723538	7.78354	0
GSM723539	9.75477	1
GSM723540	7.27444	0
GSM723541	9.21212	1
GSM723542	8.97387	0
GSM723543	9.6533	1
GSM723544	9.08685	0
GSM723545	8.93496	1
GSM723546	8.4095	0
GSM723547	9.36418	1
GSM723548	8.43436	0
GSM723549	9.14831	1
GSM723550	7.8391	0
GSM723551	9.70184	1
GSM723552	8.12554	0
GSM723553	8.63754	1
GSM723554	9.22799	0
GSM723555	8.92131	1
GSM723556	8.91474	0
GSM723557	9.30312	1
GSM723558	7.91792	0
GSM723559	9.95939	1
GSM723560	7.55796	0
GSM723561	8.98461	1
GSM723562	8.27822	0
GSM723563	9.17659	1
GSM723564	8.37451	0
GSM723565	9.28308	1
GSM723566	8.35736	0
GSM723567	8.48178	1
GSM723568	7.9401	0
GSM723569	8.96137	1
GSM723570	8.60715	0
GSM723571	9.07638	1
GSM723572	7.72076	0
GSM723573	8.81188	1
GSM723574	8.80294	0
GSM723575	8.89873	1
GSM723576	7.83859	0
GSM723577	8.6454	1
GSM723578	8.69879	0
GSM723579	10.4796	1
GSM723580	8.50222	0
GSM723581	8.31948	1
GSM723582	8.83525	0
GSM723583	8.85866	1
GSM723584	9.05984	0
GSM723585	10.1243	1
GSM723586	8.22159	0
GSM723587	9.33158	1
GSM723588	7.83103	0
GSM723589	8.65222	1
GSM723590	8.60173	0
GSM723591	8.41668	1
GSM723592	7.60328	0
GSM723593	8.94415	1
GSM723594	8.19228	0
GSM723595	9.48564	1
GSM723596	8.00568	0
GSM723597	8.45203	1
GSM723598	8.66671	0
GSM723599	8.52153	1
GSM723600	8.92135	0
GSM723601	8.41234	1
GSM723602	8.41457	0
GSM723603	9.46165	1
GSM723604	8.3301	0
GSM723605	9.89834	1
GSM723606	8.78814	0
GSM723607	9.70059	1
GSM723608	8.22933	0
GSM723609	8.93273	1
GSM723610	8.32971	0
GSM723611	9.93983	1
GSM723612	8.0544	0
GSM723613	9.38522	1
GSM723614	7.60663	0
GSM723615	7.82139	1
GSM723616	7.12666	0
GSM723617	8.35934	1
GSM723618	8.38934	0
GSM723619	8.18218	1
GSM723620	8.28377	0
GSM723621	8.8133	1
GSM723622	7.24392	0
GSM723623	8.84091	1
GSM723624	7.35663	0
GSM723625	9.13907	1
GSM723626	6.91635	0
GSM723627	8.62619	1
GSM723628	7.16504	0
GSM723629	9.03336	1
GSM723630	7.71944	0
GSM723631	9.47665	1
GSM723632	7.53494	0
GSM723633	8.49222	1
GSM723634	8.60722	0
GSM723635	8.7952	1
GSM723636	7.64047	0
GSM723637	8.36588	1
GSM723638	7.66428	0
GSM723639	9.47557	1
GSM723640	7.54631	0
GSM723641	9.71691	1
GSM723642	7.07942	0
GSM723643	7.9844	1
GSM723644	8.9613	0
GSM723645	8.93631	1
GSM723646	8.51956	0
GSM723647	9.12355	1
GSM723648	7.71869	0
GSM723649	10.3513	1
GSM723650	8.73618	0
GSM723651	9.48695	1
GSM723652	8.06497	0
GSM723653	9.27685	1
GSM723654	8.87128	0
GSM723655	9.36461	1
GSM723656	7.54926	0
GSM723657	8.54399	1
GSM723658	9.74188	0
GSM723659	9.39107	1
GSM723660	8.57734	0
GSM723661	8.74032	1
GSM723662	7.46056	0
GSM723663	9.21363	1
GSM723664	7.27469	0
GSM723665	8.99355	1
GSM723666	8.10307	0
GSM723667	8.84545	1
GSM723668	8.3286	0
GSM723669	9.39903	1
GSM723670	8.25964	0
GSM723671	9.20058	1
GSM723672	9.18535	0
GSM723673	9.93687	1
GSM723674	8.12193	0
GSM723675	9.05124	1
GSM723676	9.34967	0
GSM723677	9.11244	1
GSM723678	8.55699	0
GSM723679	9.41164	1
GSM723680	8.60395	0
GSM723681	9.58849	1
GSM723682	8.02675	0
GSM723683	9.58725	1
GSM723684	8.50119	0
GSM723685	10.4315	1
GSM723686	7.46752	0
GSM723687	8.98268	1
GSM723688	8.56383	0
GSM723689	9.47117	1
GSM723690	8.68901	0
GSM723691	8.27074	1
GSM723692	7.96234	0
GSM723693	9.40135	1
GSM723694	8.37205	0
GSM723695	9.14699	1
GSM723696	9.08267	0
GSM723697	9.38114	1
GSM723698	7.89568	0
GSM723699	8.24077	1
GSM723700	7.93064	0
GSM723701	8.18482	1
GSM723702	7.76065	0
GSM723703	9.50744	1
GSM723704	7.48446	0
GSM723705	8.48515	1
GSM723706	7.77377	0
GSM723707	9.25337	1
GSM723708	7.67306	0
GSM723709	7.91463	1
GSM723710	7.59214	0
GSM723711	9.66454	1
GSM723712	9.00254	0
GSM723713	8.98404	1
GSM723714	8.02429	0
GSM723715	8.51763	1
GSM723716	7.70465	0
GSM723717	8.8004	1
GSM723718	7.32102	0
GSM723719	8.7945	1
GSM723720	8.61117	0
GSM723721	9.80257	1
GSM723722	7.99692	0
GSM723723	10.297	1
GSM723724	7.51014	0
GSM723725	9.31872	1
GSM723726	8.85092	0
GSM723727	8.38473	1
GSM723728	7.12793	0
GSM723729	8.10876	1
GSM723730	8.46517	0
GSM723731	8.99409	1
