# Supplementary material for: Elevated limb-bud and heart development (LBH) expression indicates poor prognosis and promotes gastric cancer cell proliferation and invasion via upregulating Integrin/FAK/Akt pathway
Source: PeerJ. 2019 May 6;7:e6885. doi: 10.7717/peerj.6885 (PMC6507893; doi:10.7717/peerj.6885)
Supplement: Table S8 — The data was downloaded from GRTD ( www://gtrd.biouml.org). The CHIP-seq data showed that c-jun has 61 binding sites with the ITGB1 promoter region. [file peerj-07-6885-s008.xlsx]

## Sheet: 新建文本文档
ID	SiteCount
ENSG00000113448	338
ENSG00000182185	215
ENSG00000159216	208
ENSG00000163637	188
ENSG00000169946	186
ENSG00000141376	184
ENSG00000157168	178
ENSG00000144724	175
ENSG00000172264	166
ENSG00000127603	150
ENSG00000148498	149
ENSG00000075420	146
ENSG00000251314	144
ENSG00000145012	143
ENSG00000114861	141
ENSG00000189337	140
ENSG00000170579	139
ENSG00000162599	138
ENSG00000178031	137
ENSG00000148120	135
ENSG00000144642	134
ENSG00000173482	133
ENSG00000259345	132
ENSG00000131149	131
ENSG00000151474	131
ENSG00000283563	130
ENSG00000255872	128
ENSG00000140945	127
ENSG00000166833	127
ENSG00000151914	123
ENSG00000182621	123
ENSG00000241684	123
ENSG00000185532	121
ENSG00000282278	119
ENSG00000124788	118
ENSG00000258077	118
ENSG00000129116	116
ENSG00000224184	116
ENSG00000249859	116
ENSG00000153815	114
ENSG00000131374	113
ENSG00000164741	113
ENSG00000171735	113
ENSG00000283154	113
ENSG00000101040	111
ENSG00000145819	111
ENSG00000142599	110
ENSG00000101134	109
ENSG00000165092	109
ENSG00000156113	108
ENSG00000176124	108
ENSG00000107249	107
ENSG00000187720	107
ENSG00000027075	104
ENSG00000137936	104
ENSG00000153317	103
ENSG00000164199	103
ENSG00000170832	103
ENSG00000151150	102
ENSG00000182197	102
ENSG00000185345	102
ENSG00000196498	102
ENSG00000243797	102
ENSG00000272168	102
ENSG00000184588	101
ENSG00000184384	100
ENSG00000171132	99
ENSG00000128918	98
ENSG00000091129	97
ENSG00000145685	97
ENSG00000153707	97
ENSG00000158019	97
ENSG00000168702	97
ENSG00000250349	97
ENSG00000257923	97
ENSG00000196782	96
ENSG00000124151	93
ENSG00000129521	93
ENSG00000148655	93
ENSG00000112541	92
ENSG00000154310	92
ENSG00000157654	92
ENSG00000171444	92
ENSG00000018408	91
ENSG00000048052	91
ENSG00000112699	91
ENSG00000115306	91
ENSG00000150938	91
ENSG00000164808	91
ENSG00000198589	91
ENSG00000085276	90
ENSG00000136205	90
ENSG00000136068	89
ENSG00000038382	88
ENSG00000108175	88
ENSG00000144036	88
ENSG00000144824	88
ENSG00000153904	88
ENSG00000227036	88
ENSG00000147862	87
ENSG00000185420	87
ENSG00000187391	87
ENSG00000198964	87
ENSG00000283245	87
ENSG00000140443	86
ENSG00000142798	86
ENSG00000156831	86
ENSG00000183098	86
ENSG00000184226	86
ENSG00000233452	86
ENSG00000049323	85
ENSG00000107611	85
ENSG00000132549	85
ENSG00000150672	85
ENSG00000154229	85
ENSG00000257261	85
ENSG00000151136	84
ENSG00000182752	84
ENSG00000113719	83
ENSG00000128512	83
ENSG00000169855	83
ENSG00000184220	83
ENSG00000184903	83
ENSG00000196526	83
ENSG00000196562	83
ENSG00000049618	82
ENSG00000116117	82
ENSG00000123104	82
ENSG00000124126	82
ENSG00000127124	82
ENSG00000147408	82
ENSG00000188641	82
ENSG00000198431	82
ENSG00000271949	82
ENSG00000013297	81
ENSG00000069020	81
ENSG00000143341	81
ENSG00000145996	81
ENSG00000163638	81
ENSG00000105810	80
ENSG00000108684	80
ENSG00000149346	80
ENSG00000167522	80
ENSG00000172456	80
ENSG00000183049	80
ENSG00000184640	80
ENSG00000189283	80
ENSG00000255248	80
ENSG00000147459	79
ENSG00000169282	79
ENSG00000170776	79
ENSG00000234261	79
ENSG00000101871	78
ENSG00000138771	78
ENSG00000155849	78
ENSG00000156052	78
ENSG00000181722	78
ENSG00000183826	78
ENSG00000204634	78
ENSG00000259053	78
ENSG00000021645	77
ENSG00000049759	77
ENSG00000064655	77
ENSG00000108100	77
ENSG00000109452	77
ENSG00000138639	77
ENSG00000153250	77
ENSG00000156011	77
ENSG00000176771	77
ENSG00000232284	77
ENSG00000062716	76
ENSG00000106617	76
ENSG00000117298	76
ENSG00000136492	76
ENSG00000169398	76
ENSG00000175175	76
ENSG00000187079	76
ENSG00000197959	76
ENSG00000215483	76
ENSG00000231185	76
ENSG00000008083	75
ENSG00000101333	75
ENSG00000120254	75
ENSG00000157483	75
ENSG00000163697	75
ENSG00000167632	75
ENSG00000177694	75
ENSG00000237813	75
ENSG00000064042	74
ENSG00000104375	74
ENSG00000111110	74
ENSG00000148219	74
ENSG00000151276	74
ENSG00000183117	74
ENSG00000196588	74
ENSG00000224063	74
ENSG00000100266	73
ENSG00000107338	73
ENSG00000114541	73
ENSG00000183230	73
ENSG00000197157	73
ENSG00000243147	73
ENSG00000069702	72
ENSG00000130340	72
ENSG00000152818	72
ENSG00000155093	72
ENSG00000184349	72
ENSG00000198363	72
ENSG00000221866	72
ENSG00000070366	71
ENSG00000115183	71
ENSG00000128585	71
ENSG00000138411	71
ENSG00000151376	71
ENSG00000153113	71
ENSG00000166949	71
ENSG00000168386	71
ENSG00000185008	71
ENSG00000188107	71
ENSG00000214944	71
ENSG00000258989	71
ENSG00000053524	70
ENSG00000067798	70
ENSG00000100345	70
ENSG00000103222	70
ENSG00000115970	70
ENSG00000124942	70
ENSG00000136928	70
ENSG00000138814	70
ENSG00000152377	70
ENSG00000182606	70
ENSG00000237352	70
ENSG00000150275	69
ENSG00000151322	69
ENSG00000157827	69
ENSG00000171877	69
ENSG00000176658	69
ENSG00000224186	69
ENSG00000238290	69
ENSG00000053254	68
ENSG00000100154	68
ENSG00000133812	68
ENSG00000136830	68
ENSG00000145555	68
ENSG00000152894	68
ENSG00000160584	68
ENSG00000174469	68
ENSG00000181804	68
ENSG00000204442	68
ENSG00000215386	68
ENSG00000224228	68
ENSG00000048740	67
ENSG00000097007	67
ENSG00000099250	67
ENSG00000131558	67
ENSG00000134030	67
ENSG00000140718	67
ENSG00000145934	67
ENSG00000154556	67
ENSG00000160746	67
ENSG00000163947	67
ENSG00000169760	67
ENSG00000173068	67
ENSG00000173406	67
ENSG00000185483	67
ENSG00000227906	67
ENSG00000071054	66
ENSG00000108395	66
ENSG00000120549	66
ENSG00000125257	66
ENSG00000141564	66
ENSG00000144218	66
ENSG00000172985	66
ENSG00000196628	66
ENSG00000198846	66
ENSG00000198873	66
ENSG00000020577	65
ENSG00000065809	65
ENSG00000073792	65
ENSG00000133816	65
ENSG00000152601	65
ENSG00000159842	65
ENSG00000160145	65
ENSG00000171988	65
ENSG00000197415	65
ENSG00000227110	65
ENSG00000235770	65
ENSG00000075213	64
ENSG00000087903	64
ENSG00000099204	64
ENSG00000124813	64
ENSG00000138119	64
ENSG00000146426	64
ENSG00000156110	64
ENSG00000162631	64
ENSG00000172493	64
ENSG00000176788	64
ENSG00000185774	64
ENSG00000249867	64
ENSG00000088387	63
ENSG00000105971	63
ENSG00000111859	63
ENSG00000111961	63
ENSG00000129422	63
ENSG00000133195	63
ENSG00000134871	63
ENSG00000136828	63
ENSG00000176533	63
ENSG00000185666	63
ENSG00000197321	63
ENSG00000214900	63
ENSG00000253773	63
ENSG00000064787	62
ENSG00000067715	62
ENSG00000096060	62
ENSG00000108557	62
ENSG00000124496	62
ENSG00000140859	62
ENSG00000150995	62
ENSG00000171408	62
ENSG00000177311	62
ENSG00000197548	62
ENSG00000223725	62
ENSG00000226674	62
ENSG00000249209	62
ENSG00000254733	62
ENSG00000038532	61
ENSG00000044115	61
ENSG00000076356	61
ENSG00000083067	61
ENSG00000107104	61
ENSG00000107263	61
ENSG00000121101	61
ENSG00000130702	61
ENSG00000133401	61
ENSG00000139083	61
ENSG00000150093	61	ITGB1
ENSG00000152061	61
ENSG00000152127	61
ENSG00000159267	61
ENSG00000172380	61
ENSG00000175600	61
ENSG00000185565	61
ENSG00000185760	61
ENSG00000196277	61
ENSG00000223653	61
ENSG00000227954	61
ENSG00000048471	60
ENSG00000057019	60
ENSG00000057663	60
ENSG00000068724	60
ENSG00000069667	60
ENSG00000113645	60
ENSG00000131018	60
ENSG00000137177	60
ENSG00000143786	60
ENSG00000163635	60
ENSG00000198947	60
ENSG00000231721	60
ENSG00000233559	60
ENSG00000249738	60
ENSG00000282863	60
ENSG00000122870	59
ENSG00000147481	59
ENSG00000152104	59
ENSG00000170921	59
ENSG00000270792	59
ENSG00000004866	58
ENSG00000007047	58
ENSG00000012061	58
ENSG00000075151	58
ENSG00000120725	58
ENSG00000122786	58
ENSG00000134013	58
ENSG00000144791	58
ENSG00000151320	58
ENSG00000154678	58
ENSG00000162946	58
ENSG00000163110	58
ENSG00000173950	58
ENSG00000175198	58
ENSG00000185630	58
ENSG00000186716	58
ENSG00000228221	58
ENSG00000053747	57
ENSG00000071242	57
ENSG00000077092	57
ENSG00000082805	57
ENSG00000105889	57
ENSG00000126214	57
ENSG00000134490	57
ENSG00000137960	57
ENSG00000139793	57
ENSG00000140836	57
ENSG00000144451	57
ENSG00000151090	57
ENSG00000161040	57
ENSG00000177570	57
ENSG00000198959	57
ENSG00000224081	57
ENSG00000042832	56
ENSG00000048707	56
ENSG00000100320	56
ENSG00000112419	56
ENSG00000114279	56
ENSG00000140262	56
ENSG00000141298	56
ENSG00000148200	56
ENSG00000150347	56
ENSG00000151491	56
ENSG00000157985	56
ENSG00000162105	56
ENSG00000162909	56
ENSG00000165091	56
ENSG00000179715	56
ENSG00000182667	56
ENSG00000183780	56
ENSG00000186094	56
ENSG00000188158	56
ENSG00000249252	56
ENSG00000251432	56
ENSG00000257322	56
ENSG00000081923	55
ENSG00000101144	55
ENSG00000112414	55
ENSG00000115756	55
ENSG00000118407	55
ENSG00000130402	55
ENSG00000146592	55
ENSG00000147905	55
ENSG00000151789	55
ENSG00000153814	55
ENSG00000153944	55
ENSG00000170624	55
ENSG00000172572	55
ENSG00000172613	55
ENSG00000175471	55
ENSG00000198382	55
ENSG00000231689	55
ENSG00000234690	55
ENSG00000242908	55
ENSG00000248309	55
ENSG00000273217	55
ENSG00000010818	54
ENSG00000033122	54
ENSG00000041515	54
ENSG00000047648	54
ENSG00000090975	54
ENSG00000095066	54
ENSG00000115896	54
ENSG00000117859	54
ENSG00000134986	54
ENSG00000138835	54
ENSG00000139926	54
ENSG00000143641	54
ENSG00000143951	54
ENSG00000145982	54
ENSG00000146416	54
ENSG00000149177	54
ENSG00000150687	54
ENSG00000151693	54
ENSG00000157554	54
ENSG00000158321	54
ENSG00000165895	54
ENSG00000176406	54
ENSG00000179399	54
ENSG00000188517	54
ENSG00000196935	54
ENSG00000198929	54
ENSG00000244040	54
ENSG00000005108	53
ENSG00000054793	53
ENSG00000104447	53
ENSG00000108846	53
ENSG00000111912	53
ENSG00000120658	53
ENSG00000137968	53
ENSG00000145703	53
ENSG00000147316	53
ENSG00000151240	53
ENSG00000151532	53
ENSG00000154240	53
ENSG00000163694	53
ENSG00000164574	53
ENSG00000178209	53
ENSG00000181355	53
ENSG00000187672	53
ENSG00000196975	53
ENSG00000218336	53
ENSG00000233723	53
ENSG00000261371	53
ENSG00000064932	52
ENSG00000075391	52
ENSG00000082781	52
ENSG00000105976	52
ENSG00000117114	52
ENSG00000123066	52
ENSG00000127946	52
ENSG00000135250	52
ENSG00000144560	52
ENSG00000145779	52
ENSG00000156170	52
ENSG00000157087	52
ENSG00000162434	52
ENSG00000166016	52
ENSG00000171310	52
ENSG00000179241	52
ENSG00000184347	52
ENSG00000187239	52
ENSG00000196569	52
ENSG00000197892	52
ENSG00000230417	52
ENSG00000230561	52
ENSG00000234807	52
ENSG00000243156	52
ENSG00000256947	52
ENSG00000259040	52
ENSG00000064393	51
ENSG00000091831	51
ENSG00000095637	51
ENSG00000124191	51
ENSG00000128487	51
ENSG00000131711	51
ENSG00000133030	51
ENSG00000138162	51
ENSG00000143156	51
ENSG00000144455	51
ENSG00000144893	51
ENSG00000145349	51
ENSG00000146555	51
ENSG00000148848	51
ENSG00000160789	51
ENSG00000166780	51
ENSG00000168461	51
ENSG00000170044	51
ENSG00000178568	51
ENSG00000180891	51
ENSG00000181381	51
ENSG00000227517	51
ENSG00000237686	51
ENSG00000264031	51
ENSG00000283485	51
ENSG00000058091	50
ENSG00000074047	50
ENSG00000100592	50
ENSG00000105738	50
ENSG00000107077	50
ENSG00000112182	50
ENSG00000126091	50
ENSG00000130147	50
ENSG00000134516	50
ENSG00000137871	50
ENSG00000140694	50
ENSG00000142192	50
ENSG00000148737	50
ENSG00000164989	50
ENSG00000170965	50
ENSG00000171843	50
ENSG00000184305	50
ENSG00000184985	50
ENSG00000196090	50
ENSG00000196730	50
ENSG00000204929	50
ENSG00000205726	50
ENSG00000278540	50
